# Supplementary material
Source: HighWire-hosted journal article supplement (https://bmjopen.bmj.com/content/8/3/e020578)

### Spontaneous Vaginal Delivery

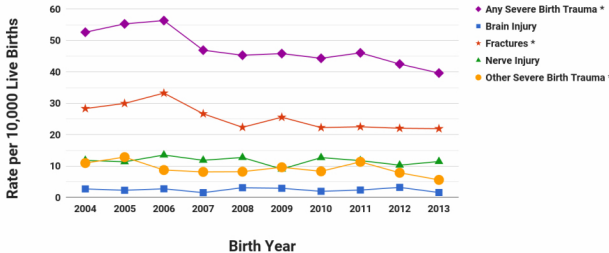

### Forceps Delivery

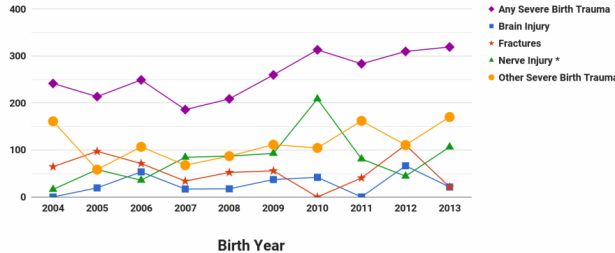

### Vacuum Delivery

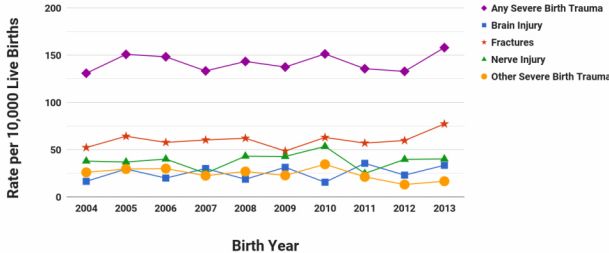

### Primary or Repeat Cesarean Delivery with Labor

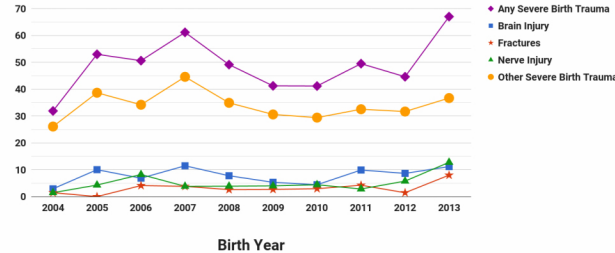

### Primary Cesarean Delivery without Labor

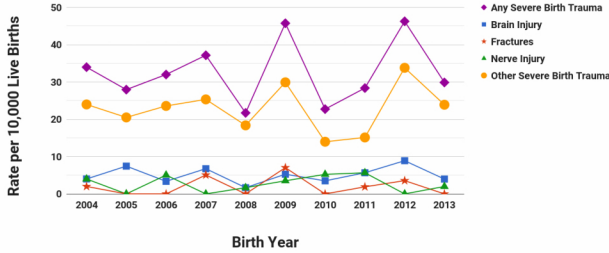

### Repeat Cesarean Delivery without Labor

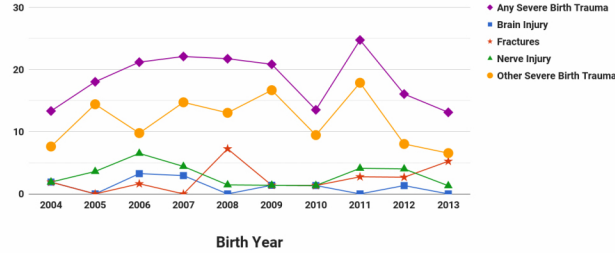

Supplement: inline-supplementary-material-3 [file inline-supplementary-material-3.pdf]
