# Supplementary material
Source: HighWire-hosted journal article supplement (https://bmjopen.bmj.com/content/8/3/e020578)

### All Vaginal Deliveries

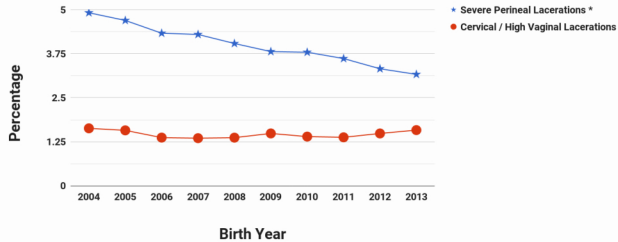

### Spontaneous Vaginal Delivery

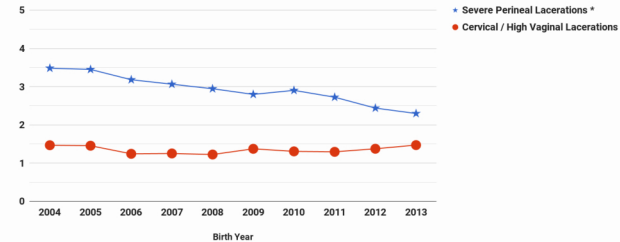

### Forceps Delivery

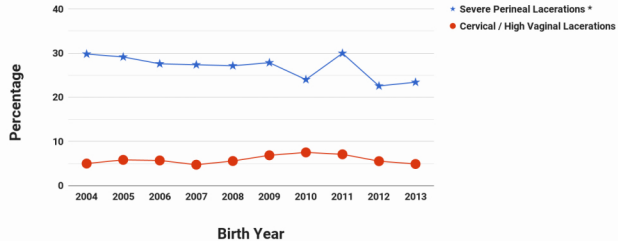

### Vacuum Delivery

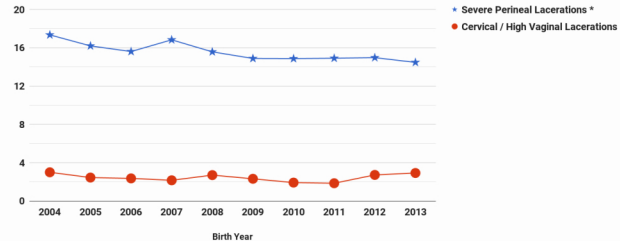

Supplement: inline-supplementary-material-4 [file inline-supplementary-material-4.pdf]
